# Supplementary material
Source: publisher figshare collection journal article supplement (https://karger.figshare.com/articles/dataset/_/5120563)
Supplement: Supplementary file 1 [file 1]

Archive with 7 entries (7 files):
- Legenden.pdf
- video1.avi
- video2.avi
- video3.avi
- video4.avi
- video5.avi
- video6.avi
