# Supplementary material
Source: publisher figshare collection journal article supplement (https://karger.figshare.com/articles/dataset/_/5120563)
Supplement: Supplementary file 1 [file 1 › Legenden.pdf]

Video 4 and 5: High-grade obstruction of the right main bronchus caused by tumor compression accompanied with decreased vibration energy during inspiration and expiration. Obstruction of the right main bronchus caused by tumor compression. Reduced vibration energy during inspiration and expiration. Significant improvement after stenting accompanied with increased vibration energy during expiration due to secretions on the stented side.

Video 6: In this case of subtotal stenosis of the right main bronchus caused by the presence of a tumor, vibration energy is increased on the right due to secretions and prolonged as compared to the left where filling of the lung is completed more rapidly while flow to the right persists. As the airway closes during expiration, the energy is significantly lower on the right during the expiratory phase.
